# Supplementary material
Source: PubMed Central journal article supplement (PMC6644021)
Supplement: ao6b00486_si_001.pdf [file ao6b00486_si_001.pdf]

## Supporting Information

### **A system for enzymatic lysine methylation in a desired sequence context**

**Vinay Kumar Aileni,<sup>†</sup> Erna Davydova,<sup>†</sup> Anders Moen,<sup>†</sup> and Pål Ø. Falnes\*<sup>†</sup>**

<sup>†</sup>Department of Biosciences, University of Oslo, P.O. BOX 1066 Blindern, 0316 Oslo, Norway.

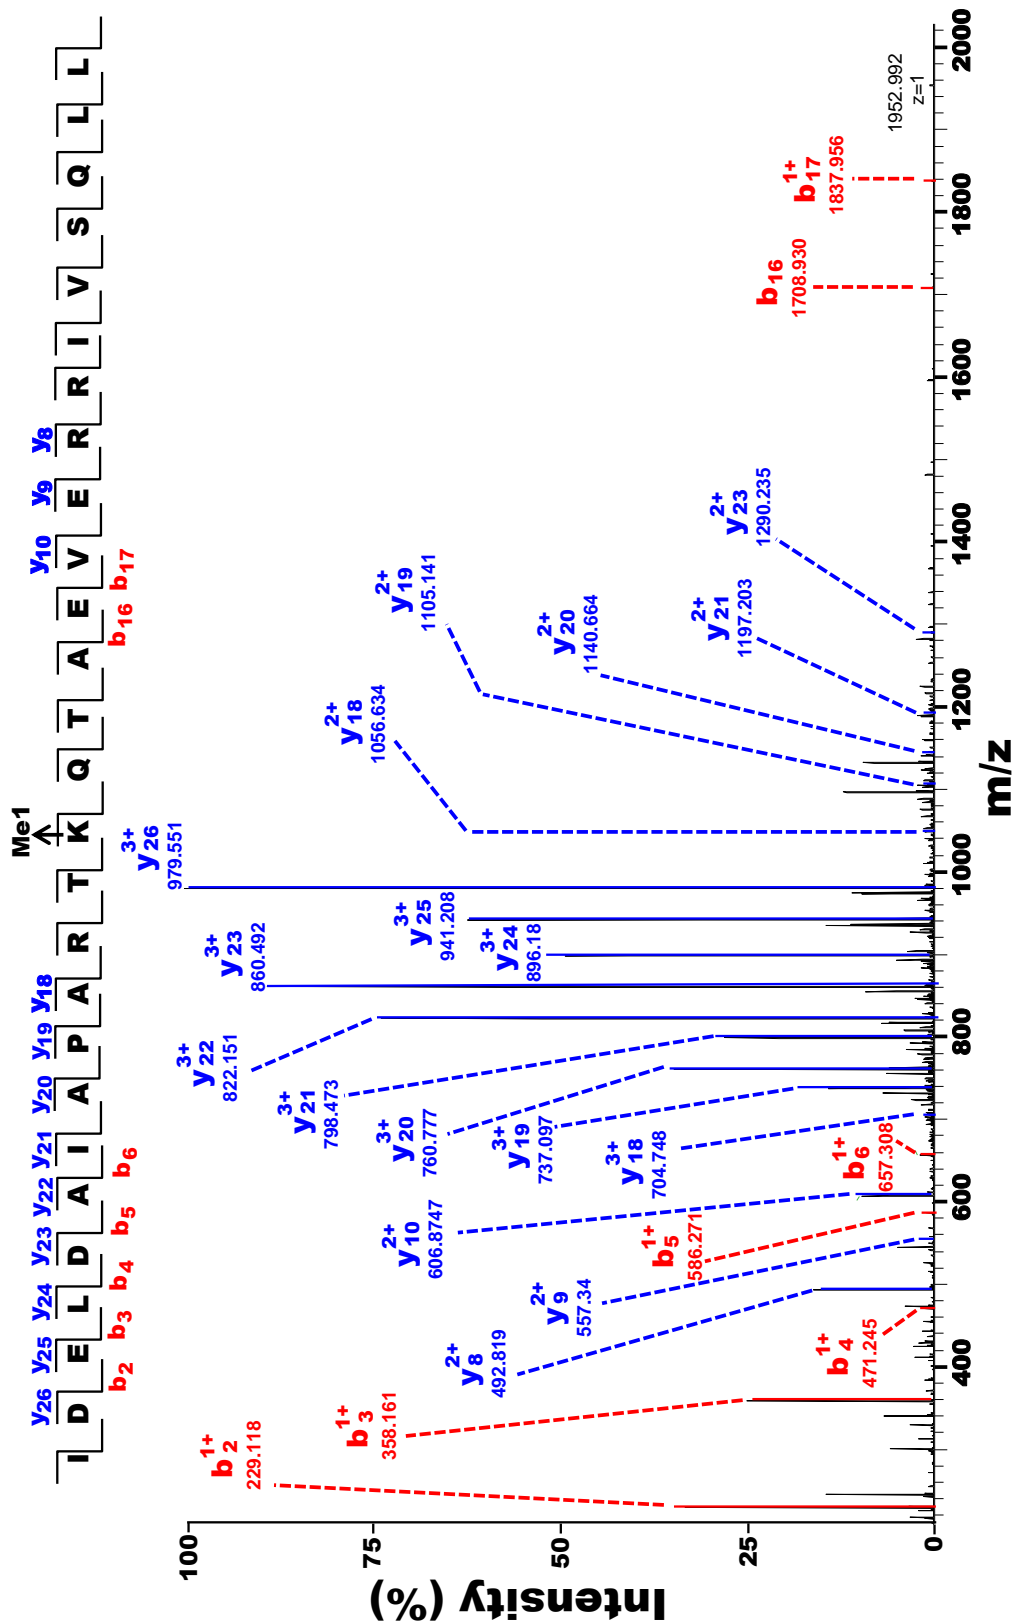

Figure S1. MS/MS spectrum of a chymotrypsin-generated peptide encompassing the lysine methylation site in the D1-H3K4 chimera. Shown is the spectrum for the 27-mer peptide representing monomethylated D1-H3K4.

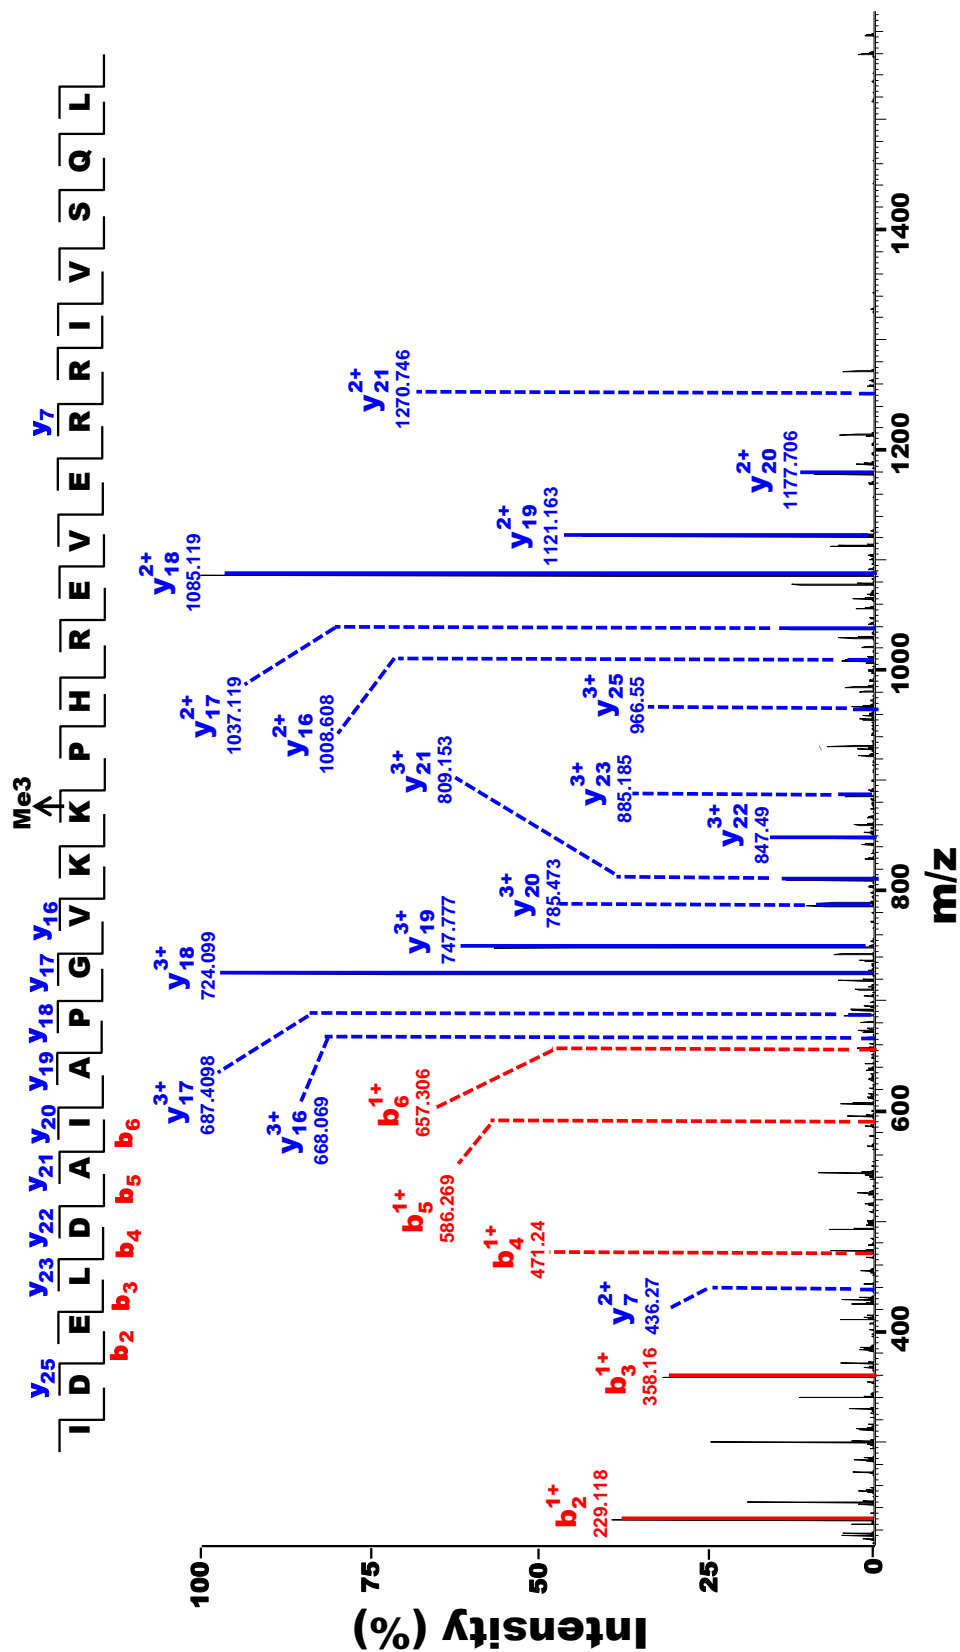

Figure S2. MS/MS spectrum of a chymotrypsin-generated peptide encompassing the lysine methylation site in the D1-H3K36 chimera. Shown is the spectrum for the 26-mer peptide representing trimethylated D1-H3K36.

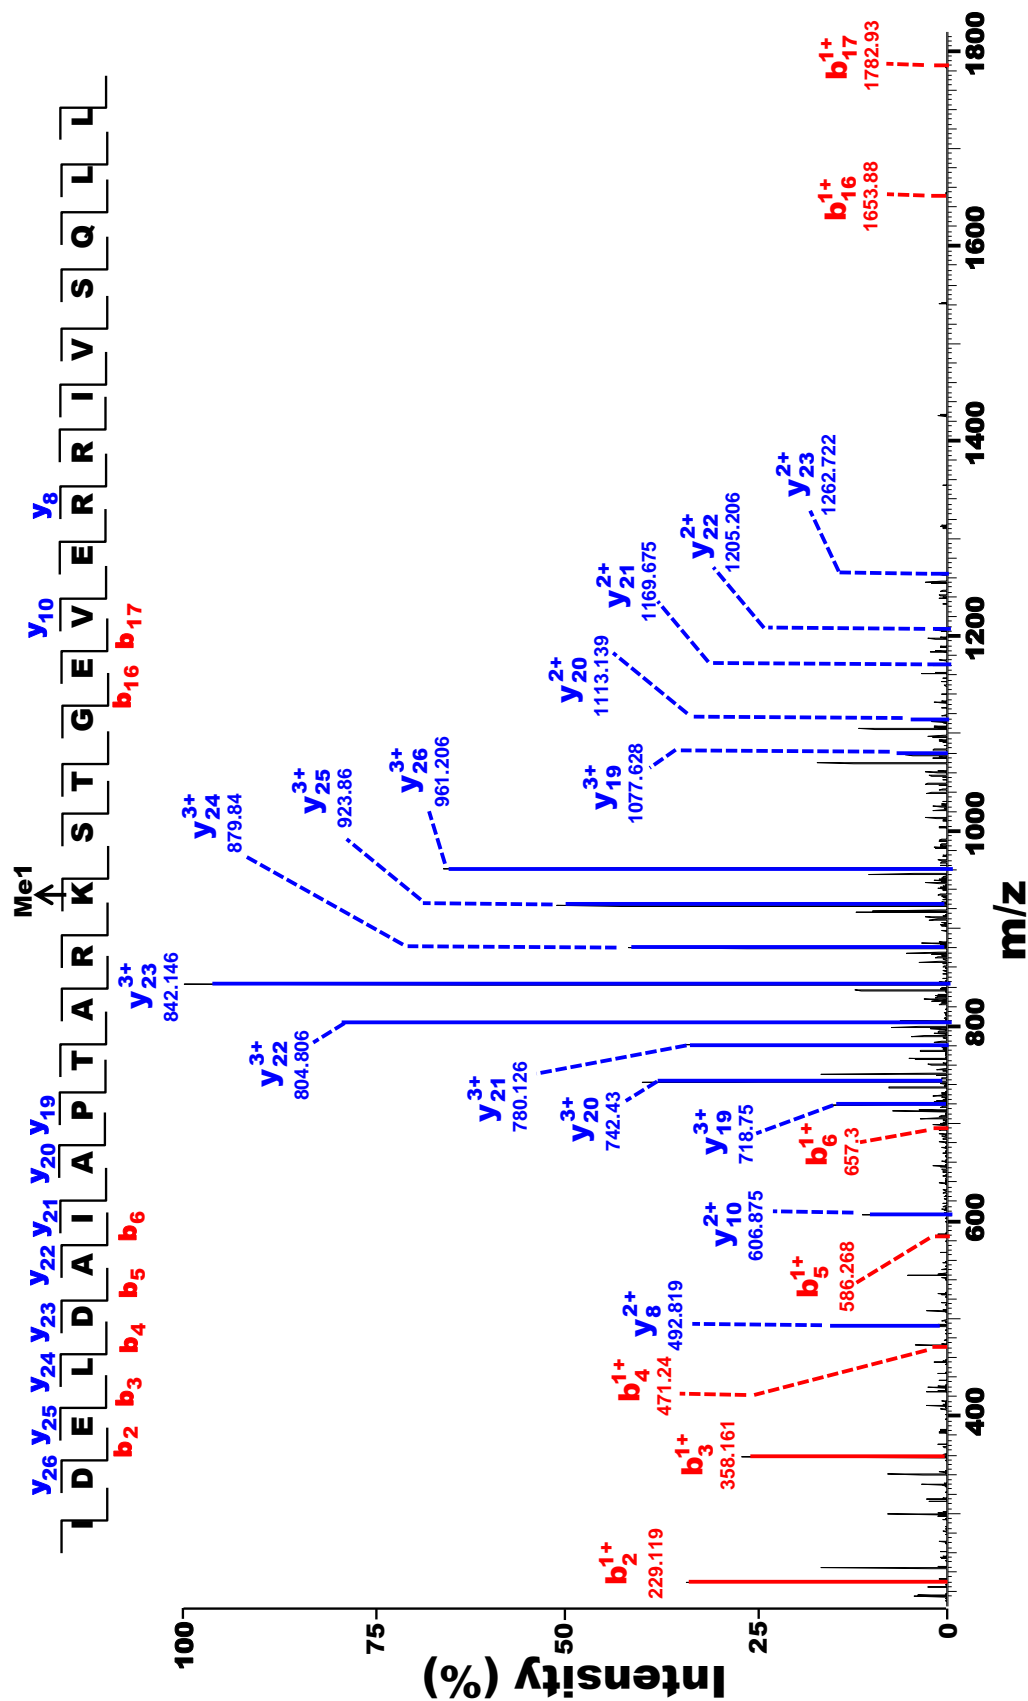

Figure S3. MS/MS spectrum of a chymotrypsin-generated peptide encompassing the lysine methylation site in the D1-H3K9 chimera. Shown is the spectrum for the 27-mer peptide representing monomethylated D1-H3K9.

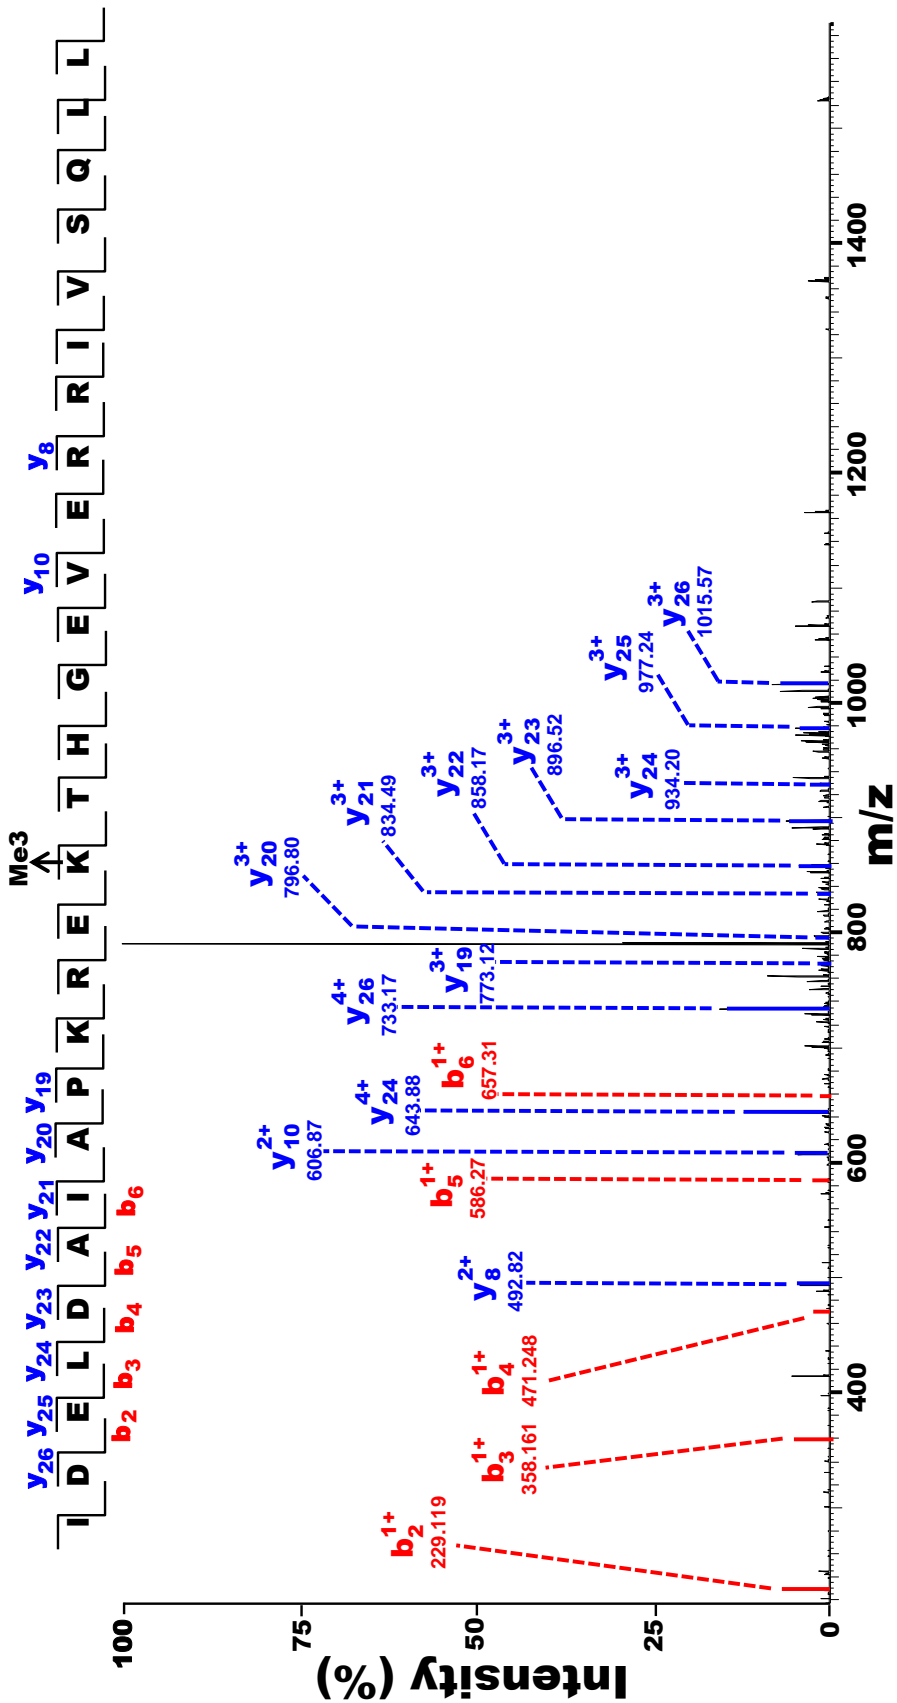

Figure S4. MS/MS spectrum of a chymotrypsin-generated peptide encompassing the lysine methylation site in the wild-type D1 protein. Shown is the spectrum for the 27-mer peptide representing trimethylated wild-type D1.

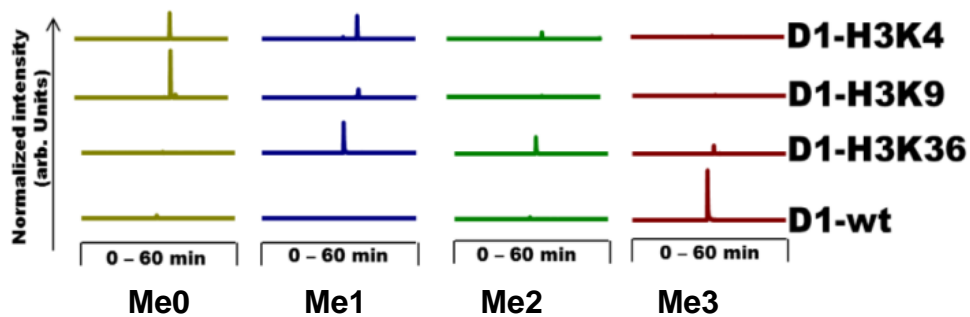

**Figure S5. Examples of extracted ion chromatograms.** Shown are extracted ion chromatograms for the four possible methylation states (Me0, Me1, Me2, Me3) of 26-mer (D1-H3K36) or 27-mer (other three proteins) chymotryptic peptides derived from cellularly expressed TAP-tagged proteins.
